# Supplementary material for: Enhancing neutralizing activity against influenza H1N1/PR8 by engineering a single-domain VL-M2 specific into a bivalent form
Source: PLOS journal article supplement (doi:10.1371/journal.pone.0273934), 2022-08-31

## Fig 1. Expression of M2::YSD

(B) Expression of M2::YSD confirmed by WB with primary anti M2 polyclonal Abs;  
N, EBY100 yeast without plasmid; 1-6: 6 different expressing yeast colonies.

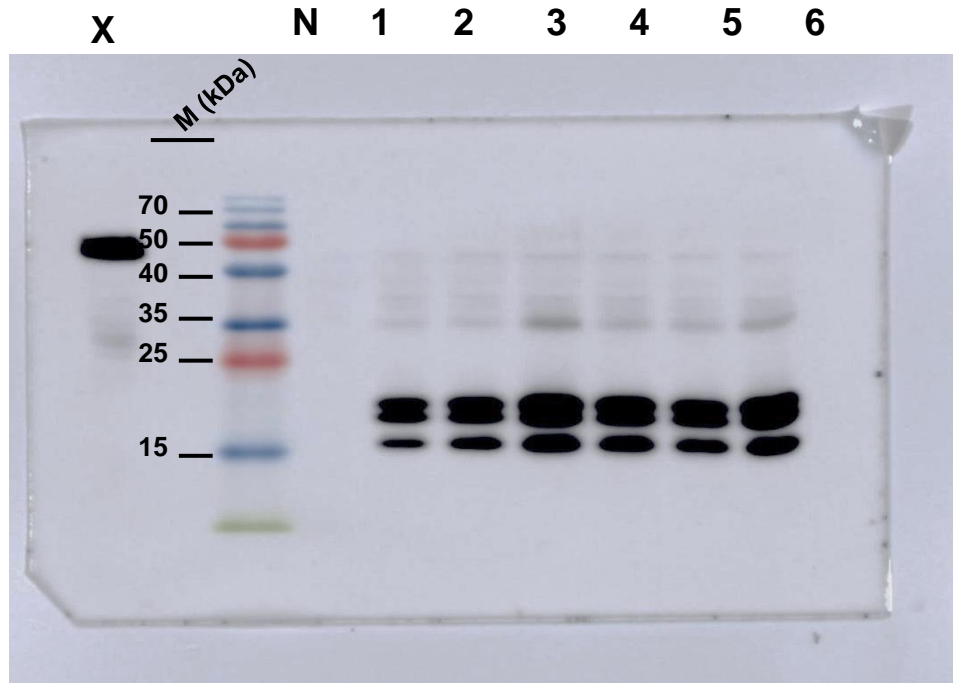

**Fig 2. M2 specific candidates isolation using bio-panning.**

(C) The 10 candidates, scFv and single-domain  $V_L$  forms, were detected using PCR with specific primers (scFv at 900 bp and  $V_L$  at 400 bp) were loaded to agarose gel.

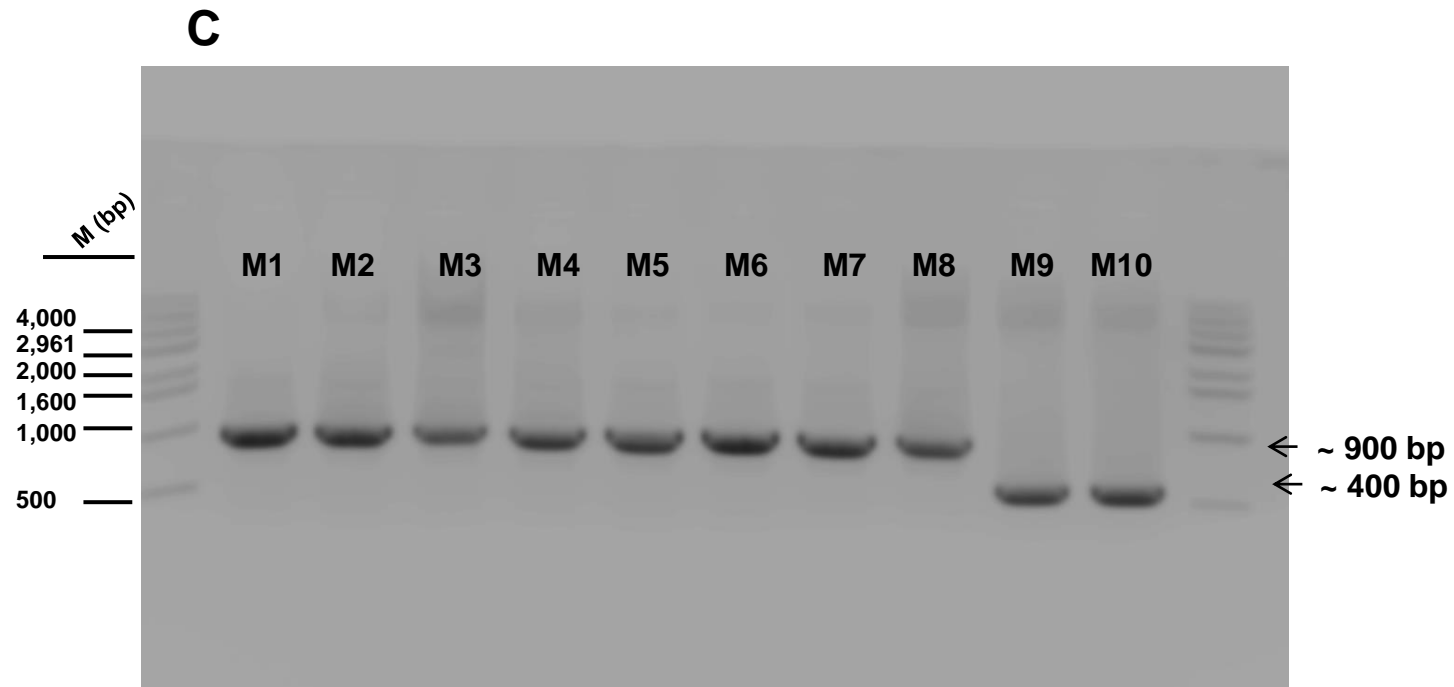

**Fig 3. Production of selected candidates in *E. coli* and their respective virion binding affinities.**  
(C) Purification results of three candidates confirmed by coomassie blue staining and western blotting using anti-His-Abs, with the size of each protein indicated, left, **NscFvM8**;

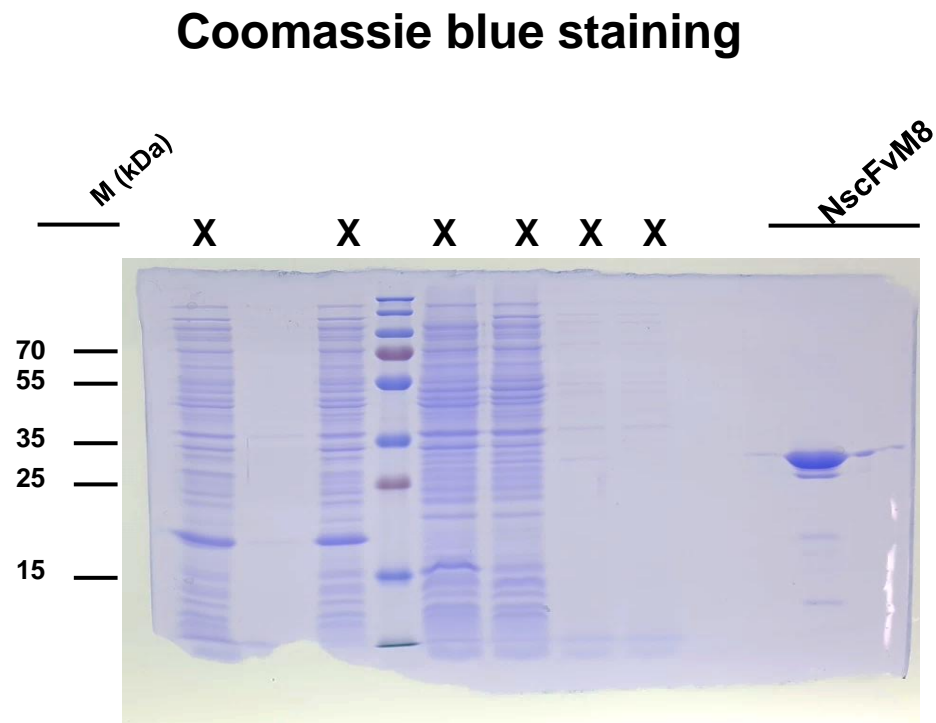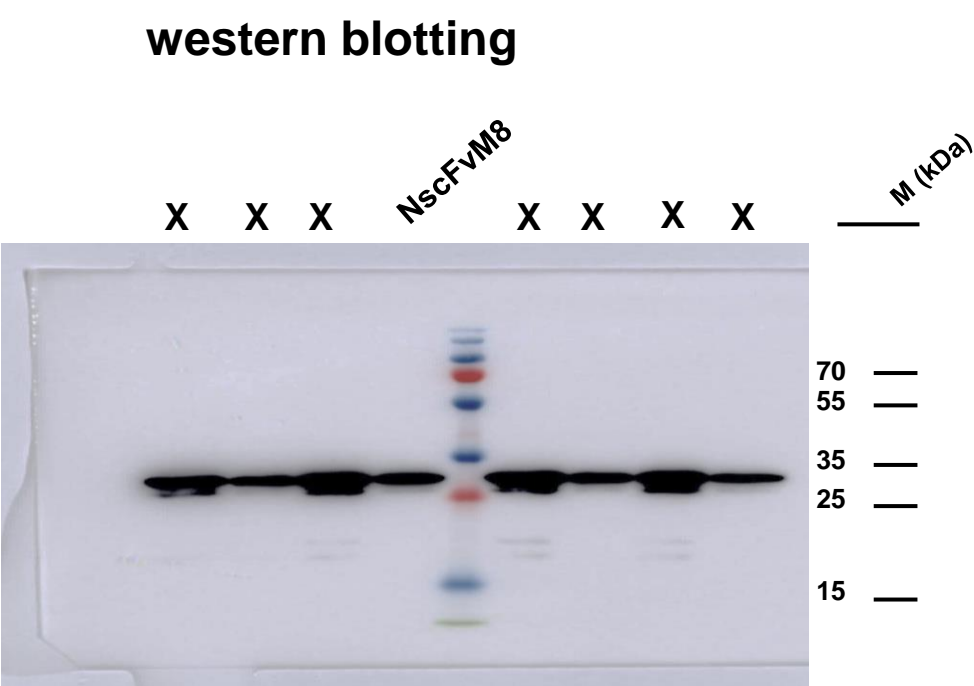

**Fig 3. Production of selected candidates in *E. coli* and their respective virion binding affinities.**  
(C) Purification results of three candidates confirmed by coomassie blue staining and western blotting using anti-His-Abs, with the size of each protein indicated, middle, **NVLM9**

**Coomassie blue staining**

**western blotting**

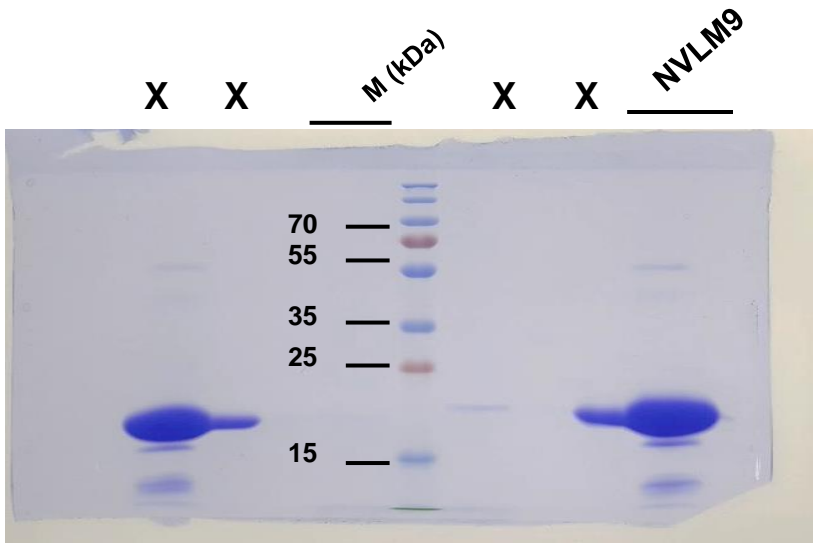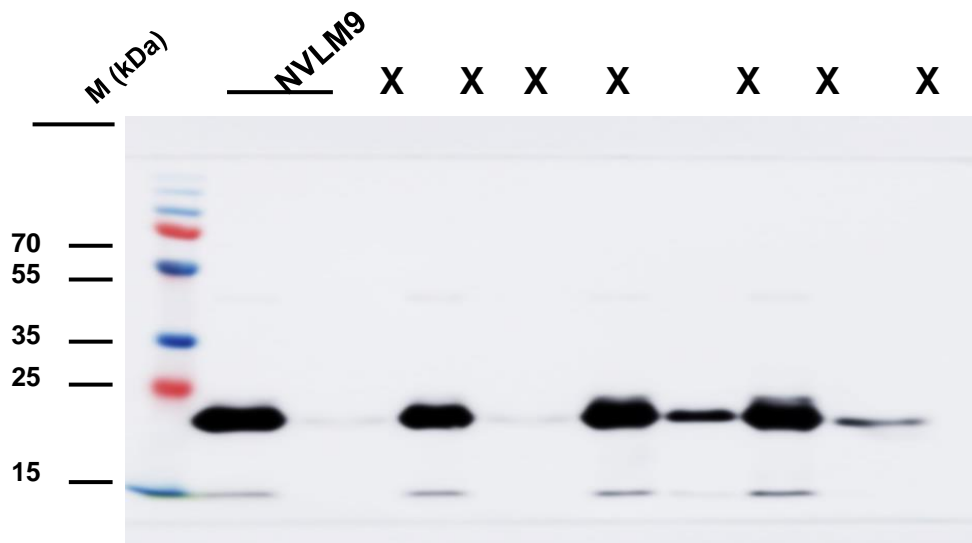

**Fig 3. Production of selected candidates in *E. coli* and their respective virion binding affinities.**

(C) Purification results of three candidates confirmed by coomassie blue staining and western blotting using anti-His-Abs, with the size of each protein indicated, right, **NVLM10**.

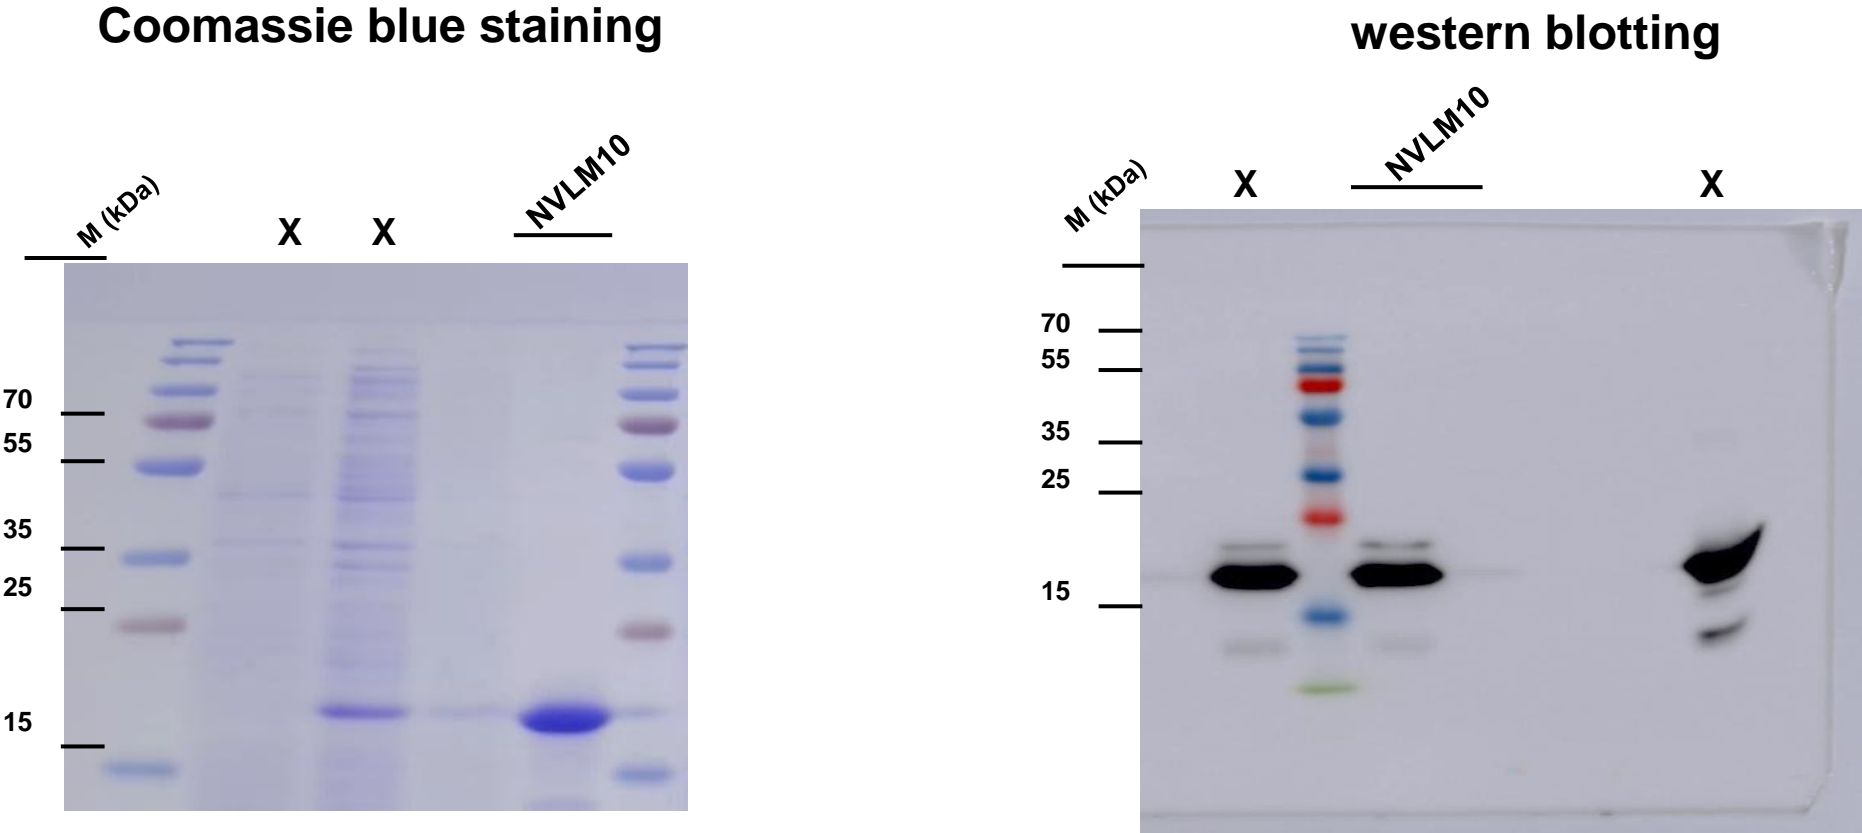

**Fig 4. Engineering of a single-domain  $V_L$  antigen specific to the M2 protein of the H1N1/PR8 virus to a bivalent form.**

(B) Purification of NVL2M10 (35 kDa) using Sepharose IgG resin exhibited high purity with coomassie blue staining and could detect anti His Abs in western blotting.

**Coomassie blue staining**

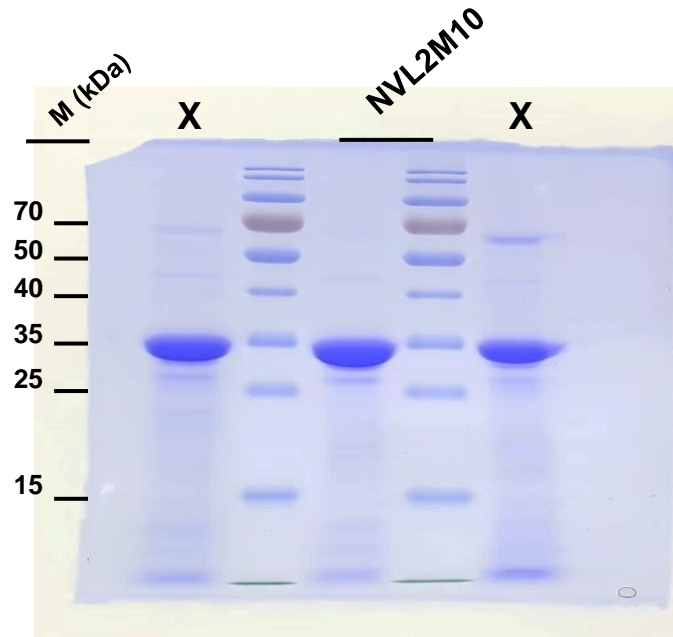

**western blotting**

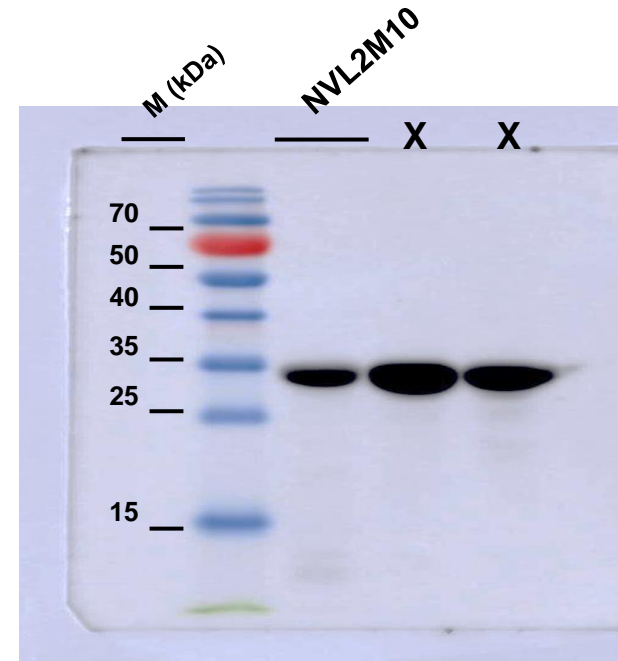

Supplement: S1 (10.1371/journal.pone.0273934.s001) [file journal.pone.0273934.s001]
